# Supplementary material for: Geochemistry and Geochronology (U-Pb and Lu-Hf) of the Soarinho Alkaline Massif (Brazil): Implications on mantle versus crustal signature of syenitic magma
Source: Preprints.org preprint supplement (doi:10.20944/preprints202305.1893.v1), 2023-05-26
Supplement: Supplementary file 3 [file Supplementary material B.docx]

**Supplementary Material B**

**GJ1 data**

| **GJ1 - spot** | **176Yb/177Hf a** | **±2s** | **176Lu/177Hf a** | **±2s** | **178Hf/177Hf** | **±2s** | **SigHf b (V)** | **176Hf/177Hf** | **±2s c** | **176Hf/177Hf(t)d** | **eHf(t) d** | **±2s c** | **age** |
| --- | --- | --- | --- | --- | --- | --- | --- | --- | --- | --- | --- | --- | --- |
| 11 | 0,011774138 | 10 | 0,00027515 | 2 | 1,466447403 |  | 11 | 0,281996768 | 26 | 0,281993658 | -15 | 1 | 602 ± 1 |
| 12 | 0,011749949 | 9 | 0,000274383 | 2 | 1,466353491 |  | 11 | 0,281994442 | 19 | 0,281991341 | -15 | 1 | 602 ± 1 |
| 13 | 0,011754687 | 9 | 0,000273049 | 2 | 1,466398332 |  | 11 | 0,281995493 | 17 | 0,281992407 | -15 | 1 | 602 ± 1 |
| 14 | 0,011768027 | 9 | 0,000273554 | 2 | 1,466420501 |  | 11 | 0,281998172 | 18 | 0,28199508 | -15 | 1 | 602 ± 1 |
| 51 | 0,011623613 | 9 | 0,000272305 | 2 | 1,466011549 |  | 11 | 0,281999397 | 26 | 0,281996319 | -14 | 1 | 602 ± 1 |
| 78 | 0,011542247 | 9 | 0,000271905 | 2 | 1,466055952 |  | 11 | 0,281994033 | 30 | 0,281990959 | -15 | 1 | 602 ± 1 |
| 80 | 0,01138167 | 9 | 0,000271003 | 2 | 1,466161807 |  | 11 | 0,281992194 | 18 | 0,281989131 | -15 | 1 | 602 ± 1 |
| 124 | 0,011115186 | 9 | 0,000270473 | 2 | 1,466500197 |  | 10 | 0,2819892 | 17 | 0,281986143 | -15 | 1 | 602 ± 1 |
| 125 | 0,01106148 | 9 | 0,000269598 | 2 | 1,466470926 |  | 10 | 0,282004712 | 16 | 0,282001665 | -14 | 1 | 602 ± 1 |
| 172 | 0,011013547 | 9 | 0,000266887 | 2 | 1,466881036 |  | 9 | 0,28198857 | 16 | 0,281985554 | -15 | 1 | 602 ± 1 |
| 223 | 0,01150191 | 9 | 0,000267458 | 2 | 1,46673475 |  | 10 | 0,281996015 | 18 | 0,281992992 | -15 | 1 | 602 ± 1 |
| 221 | 0,011205774 | 9 | 0,000267507 | 2 | 1,466683259 |  | 10 | 0,281963195 | 16 | 0,281960172 | -16 | 1 | 602 ± 1 |
| 52 | 0,011523742 | 10 | 0,000273808 | 2 | 1,46595664 |  | 11 | 0,281974915 | 20 | 0,28197182 | -15 | 1 | 602 ± 1 |
| 173 | 0,01095398 | 9 | 0,000267169 | 2 | 1,466769861 |  | 9 | 0,281967836 | 15 | 0,281964816 | -16 | 1 | 602 ± 1 |
| 222 | 0,011361843 | 9 | 0,000270161 | 2 | 1,466724921 |  | 10 | 0,281981124 | 15 | 0,28197807 | -15 | 1 | 602 ± 1 |
| 53 | 0,011467068 | 10 | 0,000273722 | 2 | 1,466083847 |  | 11 | 0,281984228 | 29 | 0,281981134 | -15 | 1 | 602 ± 1 |
