# Supplementary material for: Geochemistry and Geochronology (U-Pb and Lu-Hf) of the Soarinho Alkaline Massif (Brazil): Implications on mantle versus crustal signature of syenitic magma
Source: Preprints.org preprint supplement (doi:10.20944/preprints202305.1893.v1), 2023-05-26
Supplement: Supplementary file 4 [file Supplementary material C.docx]

**Supplementary Material C**

**Plesovice data**

| **Plesovice - spot** | **176Yb/177Hf a** | **±2s** | **176Lu/177Hf a** | **±2s** | **178Hf/177Hf** | **±2s** | **SigHf b (V)** | **176Hf/177Hf** | **±2s c** | **176Hf/177Hf(t)d** | **eHf(t) d** | **±2s c** | **age** |
| --- | --- | --- | --- | --- | --- | --- | --- | --- | --- | --- | --- | --- | --- |
| 9 | 0,010284188 | 9 | 0,000157413 | 1 | 1,466262903 |  | 17 | 0,28246482 | 20 | 0,282463826 | -4 | 1 | 337 ± 1 |
| 10 | 0,009385356 | 8 | 0,000142235 | 1 | 1,466275362 |  | 16 | 0,282470808 | 20 | 0,282469911 | -4 | 1 | 337 ± 1 |
| 49 | 0,011993666 | 10 | 0,000182808 | 1 | 1,465860142 |  | 16 | 0,282470504 | 37 | 0,28246935 | -4 | 1 | 337 ± 1 |
| 50 | 0,006531667 | 5 | 9,95202E-05 | 1 | 1,465918107 |  | 17 | 0,282480211 | 32 | 0,282479583 | -3 | 1 | 337 ± 1 |
| 75 | 0,012208149 | 10 | 0,000188704 | 1 | 1,465810015 |  | 16 | 0,28246421 | 22 | 0,282463019 | -4 | 1 | 337 ± 1 |
| 76 | 0,004919652 | 4 | 7,39066E-05 | 0 | 1,466030173 |  | 16 | 0,282470464 | 25 | 0,282469997 | -4 | 1 | 337 ± 1 |
| 77 | 0,006492423 | 6 | 9,97477E-05 | 1 | 1,465999817 |  | 17 | 0,282474415 | 25 | 0,282473786 | -4 | 1 | 337 ± 1 |
| 121 | 0,014581108 | 12 | 0,000222324 | 1 | 1,466437945 |  | 16 | 0,282465711 | 17 | 0,282464308 | -4 | 1 | 337 ± 1 |
| 169 | 0,007177392 | 6 | 0,000109755 | 1 | 1,466717123 |  | 15 | 0,282465698 | 15 | 0,282465005 | -4 | 1 | 337 ± 1 |
| 170 | 0,007990795 | 7 | 0,000122274 | 1 | 1,466730322 |  | 16 | 0,282466147 | 17 | 0,282465375 | -4 | 1 | 337 ± 1 |
| 171 | 0,013114777 | 11 | 0,00020118 | 1 | 1,466819258 |  | 16 | 0,282463886 | 15 | 0,282462616 | -4 | 1 | 337 ± 1 |
| 220 | 0,004370009 | 5 | 6,72365E-05 | 1 | 1,466783264 |  | 16 | 0,282472416 | 16 | 0,282471991 | -4 | 1 | 337 ± 1 |
| 8 | 0,012745411 | 10 | 0,000195521 | 1 | 1,46619164 |  | 16 | 0,282448697 | 28 | 0,282447463 | -4 | 1 | 337 ± 1 |
| 7 | 0,012143122 | 10 | 0,00018514 | 1 | 1,466162741 |  | 16 | 0,282451879 | 25 | 0,28245071 | -4 | 1 | 337 ± 1 |
| 48 | 0,010974397 | 9 | 0,000168753 | 1 | 1,465854422 |  | 17 | 0,282449127 | 31 | 0,282448062 | -4 | 1 | 337 ± 1 |
| 120 | 0,012331024 | 10 | 0,000191054 | 1 | 1,466437841 |  | 17 | 0,282450226 | 13 | 0,28244902 | -4 | 1 | 337 ± 1 |
| 219 | 0,014778053 | 14 | 0,000224077 | 2 | 1,466716224 |  | 15 | 0,28246122 | 19 | 0,282459805 | -4 | 1 | 337 ± 1 |
| 6 | 0,011270372 | 9 | 0,000170793 | 1 | 1,466158649 |  | 16 | 0,282460681 | 24 | 0,282459603 | -4 | 1 | 337 ± 1 |
